# Supplementary material
Source: publisher site journal article supplement (https://www.dovepress.com/get_supplementary_file.php?f=494145.docx)
Supplement: Supplementary file 1 [file get_supplementary_file.php]

**Supplementary Table 1. Sensitivity analysis:** **Person-Level Integrated Data Asset (PLIDA) dataset (N= 3,959), 2 prescriptions in 12 months**

| **Rx-Risk conditions** | **Prevalence Rx-Risk FY 2017-18 (%)** | **Prevalence self-report NHS 2017-18 (%)** | **Sensitivity/recall (95% CI)** | **Specificity (95% CI)** | **PPV/precision (95% CI)** | **NPV (95% CI)** | **F1 score** | **Kappa (95% CI)** |
| --- | --- | --- | --- | --- | --- | --- | --- | --- |
| **Hyperlipidaemia** | 47.79 | 26.8 | 85.01 (82.87-87.16) | 65.84 (64.11-67.57) | 47.67 (45.42-49.92) | 92.31 (91.16-93.46) | 0.6103 | 0.4074 (0.3814-0.4334) |
| **Heart failure** | 9.78 | 1.69 | 52.24 (40.28-64.2) | 90.96 (90.05-91.86) | 9.04 (6.19-11.9) | 99.10 (98.8-99.41) | 0.1541 | 0.1291 (0.0857-0.1724) |
| **Depression** | 18.87 | 23.06 | 49.62 (46.37-52.86) | 90.35 (89.3-91.4) | 60.64 (57.14-64.15) | 85.68 (84.47-86.89) | 0.5419 | 0.4268 (0.3928-0.4608) |
| **Hypertension** | 55.59 | 43.87 | 85.15 (83.47-86.82) | 67.51 (65.56-69.45) | 67.2 (65.2-69.16) | 85.32 (83.67-86.98) | 0.7510 | 0.5116 (0.4858-0.5375) |
| **Chronic airways disease** | 16.72 | 16.87 | 66.77 (63.19-70.34) | 93.44 (92.59-94.28) | 67.37 (63.8-70.94) | 93.27 (92.41-94.12) | 0.6664 | 0.6042 (0.5706-0.6378) |
| **Diabetes** | 14.6 | 16.62 | 78.42 (75.28-81.56) | 98.12 (97.66-98.58) | 89.27 (86.75-91.8) | 95.8 (95.12-96.48) | 0.8322 | 0.8046 (0.7787-0.8304) |
| **Osteoporosis/Paget's** | 9.78 | 16.75 | 38.31 (34.61-42.01) | 95.96 (95.29-96.64) | 65.63 (60.9-70.36) | 88.55 (87.51-89.59) | 0.4812 | 0.4111 (0.3712-0.4510) |
| **Gout** | 5.25 | 12.45 | 35.7 (31.47-39.93) | 99.08 (98.76-99.4) | 84.62 (79.71-89.52) | 91.55 (90.66-92.44) | 0.4952 | 0.4624 (0.4162-0.5086) |
| **Glaucoma** | 6.69 | 3.59 | 78.87 (72.16-85.59) | 95.99 (95.37-96.61) | 42.26 (36.32-48.21) | 99.19 (98.9-99.48) | 0.5477 | 0.5283 (0.4688-0.5879) |
| **Epilepsy** | 2.37 | 0.96 | 81.58 (69.25-93.9) | 98.39 (98.0-98.79) | 32.98 (23.47-42.48) | 99.82 (99.68-99.95) | 0.4679 | 0.4623 (0.3567-0.5680) |
| **IHD-angina** | 3.11 | 3.86 | 34.64 (27.1-42.18) | 98.16 (97.73-98.59) | 43.09 (34.34-51.84) | 97.39 (96.89-97.9) | 0.3797 | 0.3621 (0.2876-0.4366) |
| **Migraine** | 0.68 | 3.66 | 13.79 (8.18-19.41) | 99.82 (99.68-99.95) | 74.07 (57.54-90.6) | 96.82 (96.27-97.37) | 0.2211 | 0.2236 (0.1409-0.3064) |
| **Malignancies** | 1.52 | 6.72 | 12.78 (8.77-16.79) | 99.3 (99.03-99.57) | 56.67 (44.13-69.21) | 94.05 (93.31-94.79) | 0.1980 | 0.1885 (0.1306-0.2464) |
| **Psoriasis** | 0.61 | 3.33 | 9.85 (4.77-14.93) | 99.71 (99.54-99.88) | 54.17 (34.23-74.1) | 96.98 (96.44-97.51) | 0.1659 | 0.1580 (0.0799-0.2362) |
| **Macular degeneration** | 1.62 | 5 | 23.23 (17.35-29.11) | 99.52 (99.3-99.74) | 71.88 (60.86-82.89) | 96.1 (95.49-96.71) | 0.3484 | 0.3349 (0.2609-0.4089) |
| **Inflammatory autoimmune** | 2.32 | 6.74 | 18.73 (14.05-23.41) | 98.89 (98.52-99.2) | 54.35 (44.17-64.53) | 94.39 (93.66-95.11) | 0.2704 | 0.2527 (0.1919-0.3135) |
| **Renal failure** | n.p. | 3.7 | 6.12 (2.25-100) | 100 | 100 | 96.51 (95.93-97.08) | 0.1150 | 0.1116 (0.0447-0.1784) |
| **Dementia** | 0.78 | 1.21 | 27.08 (14.51-39.65) | 99.54 (99.33-99.75) | 41.94 (24.56-59.31) | 99.11 (98.82-99.4) | 0.3284 | 0.3227 (0.1881-0.4573) |
| **Bipolar disorder** | n.p. | 0.58 | 8.7 (0-20.21) | 99.92 (99.84-100) | 40 (0-82.94) | 99.47 (99.24-99.70) | 0.1429 | 0.1411 (-0.0352-0.3174) |
| **Urinary incontinence** | 1.39 | 4.85 | 8.85 (4.84-12.87) | 98.99 (98.67-99.31) | 30.91 (18.7-43.12) | 95.52 (94.87-96.17) | 0.1370 | 0.1186 (0.0604-0.1769) |

**Notes:**

NHS – National Health Survey; FY – financial year; CI – confidence interval; PPV – positive predictive value; NPV – negative predictive value

**Supplementary Table 2. Sensitivity analysis: Person-Level Integrated Data Asset (PLIDA) dataset (N= 3,959), 2 prescriptions in 3 months**

| **Rx-Risk conditions** | **Prevalence Rx-Risk FY 2017-18 (%)** | **Prevalence self-report NHS 2017-18 (%)** | **Sensitivity/recall (95% CI)** | **Specificity (95% CI)** | **PPV/precision (95% CI)** | **NPV (95% CI)** | **F1 score** | **Kappa (95% CI)** |
| --- | --- | --- | --- | --- | --- | --- | --- | --- |
| **Hyperlipidaemia** | 41.6 | 26.8 | 75.68 (73.1-78.26) | 70.88 (69.22-72.53) | 48.76 (46.34-51.17) | 88.84 (87.56-90.12) | 0.5924 | 0.3962 (0.3680-0.4245) |
| **Heart failure** | 6.87 | 1.69 | 44.78 (32.87-56.68) | 93.78 (93.02-94.54) | 11.03 (7.31-14.75) | 99.0 (98.67-99.32) | 0.1766 | 0.1540 (0.1000-0.2080) |
| **Depression** | 14.95 | 23.06 | 40.42 (37.23-43.6) | 92.68 (91.75-93.6) | 62.33 (58.43-66.23) | 83.84 (82.6-85.09) | 0.4901 | 0.3774 (0.3424-0.4124) |
| **Hypertension** | 49.46 | 43.87 | 78.76 (76.83-80.68) | 73.45 (71.61-75.28) | 69.87 (67.83-71.9) | 81.56 (79.86-83.26) | 0.7398 | 0.5149 (0.4883-0.5414) |
| **Chronic airways disease** | 10.1 | 16.87 | 42.96 (39.21-46.72) | 96.57 (95.94-97.19) | 71.75 (67.34-76.16) | 89.29 (88.28-90.31) | 0.5368 | 0.4705 (0.4315-0.5096) |
| **Diabetes** | 10.23 | 16.62 | 56.53 (52.75-60.32) | 99.0 (98.66-99.34) | 91.85 (89.19-94.52) | 91.95 (91.06-92.85) | 0.6995 | 0.6564 (0.6221-0.6907) |
| **Osteoporosis/Paget's** | 2.17 | 16.75 | 7.54 (5.53-9.55) | 98.91 (98.55-99.26) | 58.14 (47.71-68.57) | 84.17 (83.02-85.32) | 0.1335 | 0.0989 (0.0685-0.1292) |
| **Gout** | 1.44 | 12.45 | 10.14 (7.48-12.81) | 899.8 (99.65-99.95) | 87.72 (79.2-96.24) | 88.65 (87.65-89.64) | 0.1811 | 0.1601 (0.1200-0.2003) |
| **Glaucoma** | 5.46 | 3.59 | 69.01 (61.41-76.62) | 96.91 (96.36-97.46) | 45.37 (38.73-52.01) | 98.82 (98.48-99.17) | 0.5469 | 0.5270 (0.4632-0.5908) |
| **Epilepsy** | 1.11 | 0.96 | 47.37 (31.49-63.24) | 99.34 (99.08-99.59) | 40.91 (26.38-55.44) | 99.49 (99.27-99.71) | 0.4387 | 0.4332 (0.2981-0.5683) |
| **IHD-angina** | 1.84 | 3.86 | 19.61 (13.32-25.9) | 98.87 (98.53-99.21) | 41.1 (29.81-52.38) | 96.83 (96.28-97.39) | 0.2654 | 0.2467 (0.1703-0.3231) |
| **Migraine** | n.p. | 3.66 | 6.21 (2.28-10.13) | 99.97 (99.92-100) | 90.0 (71.41-100) | 96.56 (95.99-97.12) | 0.1162 | 0.1119 (0.0446-0.1793) |
| **Malignancies** | 0.86 | 6.72 | 7.14 (4.05-10.24) | 99.59 (99.39-99.8) | 55.88 (39.19-72.57) | 93.71 (92.95-94.47) | 0.1266 | 0.1132 (0.0635-0.1628) |
| **Psoriasis** | n.p. | 3.33 | 3.03 (0.11-5.95) | 99.95 (99.88-100) | 66.67 (28.95-100) | 96.76 (96.21-97.31) | 0.0580 | 0.0552 (0.0024-0.1081) |
| **Macular degeneration** | 0.76 | 5 | 11.62 (7.15-16.08) | 99.81 (99.68-99.95) | 76.67 (61.53-91.8) | 95.55 (94.9-96.19) | 0.2015 | 0.1911 (0.1230-0.2593) |
| **Inflammatory autoimmune** | 1.21 | 6.74 | 10.86 (7.13-14.59) | 99.49 (99.25-99.72) | 60.42 (46.58-74.25) | 93.91 (93.17-94.66) | 0.1832 | 0.1670 (0.1109-0.2231) |
| **Renal failure** | n.p. | 3.7 | 3.4 (0.47-6.33) | 100 | 100 | 96.41 (95.83-96.99) | 0.0658 | 0.0635 (0.0105-0.1165) |
| **Dementia** | 0.71 | 1.21 | 22.92 (11.03-34.81) | 99.57 (99.36-99.77) | 39.29 (21.2-57.38) | 99.06 (98.76-99.36) | 0.2891 | 0.2831 (0.1492-0.4169) |
| **Bipolar disorder** | - | - | - | - | - | - |  | - |
| **Urinary incontinence** | 0.38 | 4.85 | 2.08 (0.06-4.10) | 99.71 (99.54-99.88) | 26.67 (4.29-49.05) | 95.23 (94.57-95.9) | 0.0386 | 0.0318 (-0.0037-0.0674) |

**Notes:**

NHS – National Health Survey; FY – financial year; CI – confidence interval; PPV – positive predictive value; NPV – negative predictive value

**Supplementary Table 3. Comparison of weights when 1 or 2 dispensings required.**

| **Rx-Risk condition** | **Weight**  **(≥1 dispensing)** | **Weight**  **(≥2 dispensings)** |
| --- | --- | --- |
| Alcohol dependency | 0 | 0 |
| Allergies | -1 | -1 |
| Anticoagulants | 1 | 1 |
| Antiepileptics | 4 | 5 |
| Antiplatelets | 2 | 2 |
| Antipsychotics | 6 | 6 |
| Anxiety/Sedative | 1 | 1 |
| Arrhythmia | 2 | 2 |
| Benign prostatic hyperplasia (BPH) | -1 | -1 |
| Bipolar disorder | 0 | 0 |
| Chronic airways disease | 2 | 2 |
| Congestive heart failure (CHF) | 4 | 4 |
| Constipation **(NEW)** | 4 | 3 |
| Cystic fibrosis **(NEW)** | NA | NA |
| Dementia | 4 | 4 |
| Depression | 2 | 2 |
| Diabetes | 3 | 2 |
| Glaucoma | 0 | 0 |
| Gastroesophageal reflux disease (GORD) | 0 | 0 |
| Gout | 0 | 1 |
| Hepatitis B | NA | NA |
| Hepatitis C | 0 | 0 |
| Human immunodeficiency virus (HIV) | 0 | 0 |
| Hyperlipidaemia | -1 | -1 |
| Hyperkalaemia | 0 | 0 |
| Hypertension | -1 | -1 |

| Hyperthyroidism | 2 | 2 |
| --- | --- | --- |
| Hypothyroidism | 0 | 0 |
| Incontinence | 0 | 0 |
| Inflammation/pain | -1 | -1 |
| Inflammatory - glucocorticoids | 3 | 5 |
| Inflammatory autoimmune diseases (**NEW)** | -1 | -1 |
| Ischaemic heart disease (IHD): angina | 0 | 1 |
| Liver disease | 6 | 6 |
| Macular degeneration **(NEW)** | -1 | -1 |
| Malignancies | 6 | 6 |
| Migraine | -1 | -1 |
| Multiple sclerosis **(NEW)** | 0 | 0 |
| Myasthenia gravis **(NEW)** | 0 | 0 |
| Opiod dependence **(NEW)** | 6 | 6 |
| Osteoporosis/Paget’s | 0 | 0 |
| Pain - Opioid | 4 | 4 |
| Pain - Gabapentin/Pregab **(NEW)** | -1 | -1 |
| Pain - Paracetamol **(NEW*)** | 2 | 1 |
| Pancreatic insufficiency | 4 | 4 |
| Parkinsons/Restless leg syndrome (RLS) | 3 | 4 |
| Psoriasis | 0 | 0 |
| Pulmonary hypertension | 0 | 0 |
| Renal disease | 6 | 6 |
| Smoking cessation | 6 | 6 |
| Transplant | 6 | 5 |
| Tuberculosis (TB) | 0 | 0 |
